# Supplementary material for: Comparative studies of urolithins and their phase II metabolites on macrophage and neutrophil functions
Source: PubMed Central journal article supplement (PMC8137622; doi:10.1007/s00394-020-02386-y), 2020-09-22
Supplement: 394_2020_2386_MOESM1_ESM.pdf [file 394_2020_2386_MOESM1_ESM.pdf]

## Supplementary material Tables S1-S7

### *European Journal of Nutrition*

#### **Comparative studies of urolithins and their phase II metabolites on macrophage and neutrophil functions.**

Aneta Bobowska<sup>1</sup>, Sebastian Granica<sup>1</sup>, Agnieszka Filipek<sup>1</sup>, Matthias F. Melzig<sup>2</sup>, Thomas Moeslinger<sup>3</sup>, Jürgen Zentek<sup>4</sup>, Aleksandra Kruk<sup>1</sup>, Jakub P. Piwowski<sup>1,2,4</sup>

<sup>1</sup>Department of Pharmacognosy and Molecular Basis of Phytotherapy, Faculty of Pharmacy, Medical University of Warsaw, Warsaw, Poland

<sup>2</sup>Department of Pharmaceutical Biology, Institute of Pharmacy, Freie Universität Berlin, Berlin, Germany

<sup>3</sup>Institute of Physiology, Center for Physiology and Pharmacology, Medical University of Vienna, Vienna, Austria

<sup>4</sup>Institute of Animal Nutrition, Freie Universität Berlin, Berlin, Germany

Corresponding author:

dr hab. Jakub Patryk Piwowski, Department of Pharmacognosy and Molecular Basis of Phytotherapy, Faculty of Pharmacy, Medical University of Warsaw, Banacha 1, 02-097 Warsaw, Poland. e-mail: jakub.piwowski@wum.edu.pl

ORCID: <http://orcid.org/0000-0002-5011-0983>

**Table S1.** Effects of tested urolithins and respective glucuronides at the concentration of 40  $\mu$ M on viability of THP-1 macrophages. PMA-differentiated THP-1 cells were preincubated for 1h with iso-urolithin A, urolithin A and B (iUA, UA, UB), their respective glucuronides (GiUA, GUA, GUB) at the concentration of 40  $\mu$ M, parthenolide (Parth) at the concentration of 5  $\mu$ M and stimulated with LPS (10 ng/mL) for 24 h. MTT test was performed as described in Materials and methods section.

|                     | viability (%) | SD   | <i>post hoc</i> (Dunnett) |                 | <i>post hoc</i> (Tukey) |          |          |          |          |          |          |          |          |  |  |  |  |  |
|---------------------|---------------|------|---------------------------|-----------------|-------------------------|----------|----------|----------|----------|----------|----------|----------|----------|--|--|--|--|--|
|                     |               |      | <i>p</i> (<LPS)           | <i>p</i> (>LPS) | NST                     | LPS      | iUA      | GiUA     | UA       | GUA      | UB       | GUB      |          |  |  |  |  |  |
| <b>NST</b>          | 109,4         | 3,9  | 0,999954                  | 0,058926        | <b>NST</b>              |          |          |          |          |          |          |          |          |  |  |  |  |  |
| <b>LPS</b>          | 100,0         | 2,1  |                           |                 | <b>LPS</b>              | 0,380802 |          |          |          |          |          |          |          |  |  |  |  |  |
| <b>iUA</b>          | 103,3         | 11,7 | 0,986367                  | 0,554204        | <b>iUA</b>              | 0,855963 | 0,993753 |          |          |          |          |          |          |  |  |  |  |  |
| <b>GiUA</b>         | 101,8         | 6,5  | 0,959475                  | 0,726273        | <b>GiUA</b>             | 0,655934 | 0,999920 | 0,999982 |          |          |          |          |          |  |  |  |  |  |
| <b>UA</b>           | 94,8          | 4,7  | 0,325675                  | 0,997400        | <b>UA</b>               | 0,026668 | 0,903563 | 0,406000 | 0,655506 |          |          |          |          |  |  |  |  |  |
| <b>GUA</b>          | 94,6          | 5,0  | 0,300016                  | 0,997917        | <b>GUA</b>              | 0,022926 | 0,879444 | 0,368967 | 0,614636 | 1,000000 |          |          |          |  |  |  |  |  |
| <b>UB</b>           | 106,2         | 11,6 | 0,998179                  | 0,285092        | <b>UB</b>               | 0,998662 | 0,912834 | 0,999304 | 0,988082 | 0,282639 | 0,258121 |          |          |  |  |  |  |  |
| <b>GUB</b>          | 99,9          | 4,4  | 0,873140                  | 0,886020        | <b>GUB</b>              | 0,366829 | 1,000000 | 0,992357 | 0,999879 | 0,912758 | 0,890002 | 0,905373 |          |  |  |  |  |  |
| <b>Parthenolide</b> | 99,7          | 3,3  | 0,862237                  | 0,895542        | <b>Parthenolide</b>     | 0,343553 | 1,000000 | 0,994194 | 0,999883 | 0,955880 | 0,942433 | 0,891711 | 1,000000 |  |  |  |  |  |

**Table S2.** Effects of tested urolithins and respective glucuronides at the concentration of 40  $\mu$ M on apoptosis of non-stimulated (A) and LPS-stimulated (100 ng/ml) (B) human primary neutrophils. Neutrophils were incubated with iso-urolithin A, urolithin A and B (iUA, UA, UB), their respective glucuronides (GiUA, GUA, GUB) at the concentration of 40  $\mu$ M, roscovitine at the concentration of 40  $\mu$ M and/or stimulated with LPS (10 ng/mL) for 20 h. Neutrophils' viability and apoptosis was determined by staining with propidium iodide (PI) and Annexin V-FITC after 6h in non-stimulated cells (A) and after 20h in LPS-stimulated cells.

| without LPS (6h) |            |     |                           |                 |                     |     |                           |                 |                    |     |                           |                 |
|------------------|------------|-----|---------------------------|-----------------|---------------------|-----|---------------------------|-----------------|--------------------|-----|---------------------------|-----------------|
|                  | viable (%) | SD  | <i>post hoc</i> (Dunnett) |                 |                     |     | <i>post hoc</i> (Dunnett) |                 |                    |     | <i>post hoc</i> (Dunnett) |                 |
|                  |            |     | <i>p</i> (<NST)           | <i>p</i> (>NST) | early apoptosis (%) | SD  | <i>p</i> (<NST)           | <i>p</i> (>NST) | late apoptosis (%) | SD  | <i>p</i> (<NST)           | <i>p</i> (>NST) |
| NST              | 88,8       | 4,4 |                           |                 | 9,1                 | 2,9 |                           |                 | 1,9                | 1,8 |                           |                 |
| LPS              | 93,2       | 3,5 | 0,999945                  | 0,077183        | 5,2                 | 2,7 | 0,035004                  | 0,999969        | 1,4                | 0,9 | 0,572742                  | 0,988726        |
| iUA              | 90,4       | 2,4 | 0,986898                  | 0,595769        | 8,4                 | 2,2 | 0,730938                  | 0,968313        | 1,1                | 0,5 | 0,397543                  | 0,996664        |
| GiUA             | 90,5       | 2,0 | 0,990130                  | 0,999999        | 8,7                 | 1,9 | 0,813820                  | 0,943284        | 0,7                | 0,2 | 0,162098                  | 0,999821        |
| UA               | 91,2       | 2,2 | 0,996629                  | 0,398937        | 6,9                 | 1,2 | 0,274710                  | 0,998804        | 1,7                | 0,9 | 0,784393                  | 0,954204        |
| GUA              | 89,9       | 2,5 | 0,972962                  | 0,707114        | 9,0                 | 1,6 | 0,869998                  | 0,911451        | 1,0                | 0,6 | 0,308857                  | 0,998373        |
| UB               | 93,1       | 1,1 | 0,999939                  | 0,083205        | 5,8                 | 0,9 | 0,074388                  | 0,999947        | 0,9                | 0,4 | 0,291258                  | 0,998608        |
| GUB              | 90,7       | 2,6 | 0,992621                  | 0,508888        | 8,2                 | 2,1 | 0,675748                  | 0,977990        | 0,9                | 0,4 | 0,279834                  | 0,998746        |
| Roscovitine      | 29,3       | 0,6 | 0,000019                  | 0,999978        | 67,4                | 0,4 | 0,999978                  | 0,000019        | 3,1                | 0,3 | 0,999086                  | 0,247267        |

| with LPS 20h |            |      |                           |                 |                     |      |                           |                 |                    |     |                           |                 |
|--------------|------------|------|---------------------------|-----------------|---------------------|------|---------------------------|-----------------|--------------------|-----|---------------------------|-----------------|
|              | viable (%) | SD   | <i>post hoc</i> (Dunnett) |                 |                     |      | <i>post hoc</i> (Dunnett) |                 |                    |     | <i>post hoc</i> (Dunnett) |                 |
|              |            |      | <i>p</i> (<LPS)           | <i>p</i> (>LPS) | early apoptosis (%) | SD   | <i>p</i> (<LPS)           | <i>p</i> (>LPS) | late apoptosis (%) | SD  | <i>p</i> (<LPS)           | <i>p</i> (>LPS) |
| NST          | 34,8       | 3,8  | 0,000005                  | 0,999978        | 43,7                | 10,0 | 0,999979                  | 0,000026        | 20,0               | 5,1 | 0,999978                  | 0,000005        |
| LPS          | 82,6       | 6,1  |                           |                 | 13,6                | 5,0  |                           |                 | 3,2                | 0,9 |                           |                 |
| iUA          | 79,1       | 5,9  | 0,637201                  | 0,970780        | 17,2                | 5,2  | 0,985812                  | 0,530331        | 2,8                | 1,1 | 0,820630                  | 0,908687        |
| GiUA         | 76,1       | 10,4 | 0,385180                  | 0,994085        | 15,6                | 4,8  | 0,959505                  | 0,703248        | 5,4                | 3,4 | 0,990567                  | 0,453445        |
| UA           | 78,5       | 5,6  | 0,585185                  | 0,978580        | 17,6                | 4,3  | 0,988943                  | 0,490735        | 3,4                | 1,1 | 0,889707                  | 0,847534        |
| GUA          | 76,5       | 9,7  | 0,417738                  | 0,992573        | 16,6                | 5,1  | 0,978028                  | 0,601980        | 5,1                | 3,2 | 0,984787                  | 0,528806        |
| UB           | 86,6       | 4,7  | 0,976311                  | 0,602008        | 9,2                 | 3,3  | 0,456219                  | 0,991159        | 3,1                | 1,7 | 0,852507                  | 0,885643        |
| GUB          | 75,5       | 10,5 | 0,378365                  | 0,994367        | 16,2                | 6,3  | 0,968035                  | 0,664256        | 6,8                | 3,8 | 0,998470                  | 0,224425        |
| Roscovitine  | 3,8        | 2,9  | 0,000005                  | 0,999978        | 82,7                | 0,8  | 0,999979                  | 0,000024        | 11,7               | 1,1 | 0,999978                  | 0,001460        |

**Table S3.** Effects of tested urolithins and respective glucuronides at the concentration of 40  $\mu$ M on LPS-induced TNF- $\alpha$  and IL-10 production. PMA-differentiated THP-1 cells were preincubated for 1h with iso-urolithin A, urolithin A and B (iUA, UA, UB) and their respective glucuronides (GiUA, GUA, GUB) at the concentration of 40  $\mu$ M and stimulated with LPS (10 ng/mL).

|              | TNF- $\alpha$ 3h (%) | SD   | <i>post hoc</i> (Dunnett) |                 | <i>post hoc</i> (Tukey) |          |          |          |          |          |          |          |          |          |
|--------------|----------------------|------|---------------------------|-----------------|-------------------------|----------|----------|----------|----------|----------|----------|----------|----------|----------|
|              |                      |      | <i>p</i> (<LPS)           | <i>p</i> (>LPS) | NST                     | LPS      | iUA      | GiUA     | UA       | GUA      | UB       | GUB      |          |          |
| NST          | 0,0                  | 0,0  | 0,000022                  | 0,999963        | NST                     |          |          |          |          |          |          |          |          |          |
| LPS          | 100,0                | 4,0  |                           |                 | LPS                     | 0,000136 |          |          |          |          |          |          |          |          |
| iUA          | 93,1                 | 11,7 | 0,108434                  | 0,999962        | iUA                     | 0,000136 | 0,540174 |          |          |          |          |          |          |          |
| GiUA         | 106,3                | 8,7  | 0,999921                  | 0,283703        | GiUA                    | 0,000136 | 0,908662 | 0,115742 |          |          |          |          |          |          |
| UA           | 55,7                 | 8,1  | 0,000022                  | 0,999963        | UA                      | 0,000136 | 0,000136 | 0,000136 | 0,000136 |          |          |          |          |          |
| GUA          | 97,7                 | 8,4  | 0,751957                  | 0,994840        | GUA                     | 0,000136 | 0,999597 | 0,959170 | 0,638124 | 0,000136 |          |          |          |          |
| UB           | 89,1                 | 8,9  | 0,004432                  | 0,999963        | UB                      | 0,000136 | 0,054933 | 0,964476 | 0,011138 | 0,000136 | 0,423909 |          |          |          |
| GUB          | 98,1                 | 9,6  | 0,791211                  | 0,992500        | GUB                     | 0,000136 | 0,999842 | 0,905742 | 0,696014 | 0,000136 | 1,000000 | 0,272747 |          |          |
| Parthenolide | 33,2                 | 5,5  | 0,000022                  | 0,999963        | Parthenolide            | 0,000136 | 0,000136 | 0,000136 | 0,000136 | 0,000166 | 0,000136 | 0,000136 | 0,000136 | 0,000136 |

|              | TNF- $\alpha$ 6h (%) | SD   | <i>post hoc</i> (Dunnett) |                 | <i>post hoc</i> (Tukey) |          |          |          |          |          |          |          |          |          |
|--------------|----------------------|------|---------------------------|-----------------|-------------------------|----------|----------|----------|----------|----------|----------|----------|----------|----------|
|              |                      |      | <i>p</i> (<LPS)           | <i>p</i> (>LPS) | NST                     | LPS      | iUA      | GiUA     | UA       | GUA      | UB       | GUB      |          |          |
| NST          | 2,9                  | 1,0  | 0,000021                  | 0,999967        | NST                     |          |          |          |          |          |          |          |          |          |
| LPS          | 100,0                | 12,5 |                           |                 | LPS                     | 0,000144 |          |          |          |          |          |          |          |          |
| iUA          | 134,6                | 9,8  | 0,999967                  | 0,000021        | iUA                     | 0,000144 | 0,000144 |          |          |          |          |          |          |          |
| GiUA         | 109,5                | 9,9  | 0,999959                  | 0,139040        | GiUA                    | 0,000144 | 0,717004 | 0,000777 |          |          |          |          |          |          |
| UA           | 75,2                 | 7,7  | 0,000028                  | 0,999967        | UA                      | 0,000144 | 0,000924 | 0,000144 | 0,000145 |          |          |          |          |          |
| GUA          | 94,1                 | 8,7  | 0,438330                  | 0,999323        | GUA                     | 0,000144 | 0,973293 | 0,000144 | 0,127700 | 0,024815 |          |          |          |          |
| UB           | 112,1                | 12,3 | 0,999967                  | 0,041287        | UB                      | 0,000144 | 0,398475 | 0,003483 | 0,999905 | 0,000144 | 0,038329 |          |          |          |
| GUB          | 101,5                | 10,1 | 0,973598                  | 0,862002        | GUB                     | 0,000144 | 0,999999 | 0,000146 | 0,863149 | 0,000440 | 0,906987 | 0,574407 |          |          |
| Parthenolide | 41,1                 | 8,8  | 0,000021                  | 0,999967        | Parthenolide            | 0,000144 | 0,000144 | 0,000144 | 0,000144 | 0,000145 | 0,000144 | 0,000144 | 0,000144 | 0,000144 |

|              | IL-10 24h (%) | SD   | <i>post hoc</i> (Dunnett) |                 | <i>post hoc</i> (Tukey) |          |          |          |          |          |          |          |          |  |
|--------------|---------------|------|---------------------------|-----------------|-------------------------|----------|----------|----------|----------|----------|----------|----------|----------|--|
|              |               |      | <i>p</i> (<LPS)           | <i>p</i> (>LPS) | NST                     | LPS      | iUA      | GiUA     | UA       | GUA      | UB       | GUB      |          |  |
| NST          | 74,2          | 21,6 | 0,000096                  | 0,999962        | NST                     |          |          |          |          |          |          |          |          |  |
| LPS          | 100,0         | 5,0  |                           |                 | LPS                     | 0,001091 |          |          |          |          |          |          |          |  |
| iUA          | 141,4         | 21,6 | 0,999962                  | 0,000023        | iUA                     | 0,000134 | 0,000466 |          |          |          |          |          |          |  |
| GiUA         | 98,3          | 15,7 | 0,903330                  | 0,975355        | GiUA                    | 0,154255 | 1,000000 | 0,000286 |          |          |          |          |          |  |
| UA           | 97,5          | 24,3 | 0,869079                  | 0,984106        | UA                      | 0,081641 | 0,999997 | 0,000242 | 1,000000 |          |          |          |          |  |
| GUA          | 110,4         | 7,4  | 0,999863                  | 0,358578        | GUA                     | 0,001233 | 0,939385 | 0,019344 | 0,902516 | 0,821682 |          |          |          |  |
| UB           | 115,7         | 15,9 | 0,999962                  | 0,081222        | UB                      | 0,000159 | 0,534456 | 0,098237 | 0,561303 | 0,332117 | 0,999316 |          |          |  |
| GUB          | 111,2         | 11,1 | 0,999939                  | 0,305872        | GUB                     | 0,000902 | 0,909641 | 0,025232 | 0,865956 | 0,768436 | 1,000000 | 0,999796 |          |  |
| Parthenolide | 69,4          | 2,8  | 0,015201                  | 0,999962        | Parthenolide            | 0,999992 | 0,369049 | 0,000157 | 0,450495 | 0,486247 | 0,072814 | 0,024938 | 0,062485 |  |

**Table S4.** Effects of tested urolithins and respective glucuronides at the concentration of 40  $\mu$ M on LPS-induced TNF- $\alpha$  and TGF- $\beta$ 1 mRNA expression in THP-1 macrophages. PMA-differentiated THP-1 cells were preincubated for 1h with iso-urolithin A, urolithin A and B (iUA, UA, UB) and their respective glucuronides (GiUA, GUA, GUB) at the concentration of 40  $\mu$ M and stimulated with LPS (10 ng/mL) for 24 h. Real-time RT-PCR analysis was performed as described in Materials and methods section. Changes in mRNA expression were normalized to  $\beta$ -actin. Parthenolide at the concentration of 5  $\mu$ M was used as a positive control.

|              | TNF- $\alpha$ mRNA expression | SD    | <i>post hoc</i> (Dunnett) |                 | <i>post hoc</i> (Tukey) |          |          |          |          |          |          |          |          |  |
|--------------|-------------------------------|-------|---------------------------|-----------------|-------------------------|----------|----------|----------|----------|----------|----------|----------|----------|--|
|              |                               |       | <i>p</i> (<LPS)           | <i>p</i> (>LPS) | NST                     | LPS      | iUA      | GiUA     | UA       | GUA      | UB       | GUB      |          |  |
| NST          | 0,307                         | 0,100 | 0,000021                  | 0,999977        | NST                     |          |          |          |          |          |          |          |          |  |
| LPS          | 1,000                         | 0,000 |                           |                 | LPS                     | 0,000157 |          |          |          |          |          |          |          |  |
| iUA          | 1,656                         | 0,357 | 0,999977                  | 0,000023        | iUA                     | 0,000151 | 0,000167 |          |          |          |          |          |          |  |
| GiUA         | 1,259                         | 0,169 | 0,999963                  | 0,048627        | GiUA                    | 0,000151 | 0,264518 | 0,015475 |          |          |          |          |          |  |
| UA           | 0,696                         | 0,050 | 0,019004                  | 0,999974        | UA                      | 0,018594 | 0,118597 | 0,000151 | 0,000376 |          |          |          |          |  |
| GUA          | 1,075                         | 0,099 | 0,982345                  | 0,628681        | GUA                     | 0,000152 | 0,997784 | 0,000290 | 0,687112 | 0,023592 |          |          |          |  |
| UB           | 0,885                         | 0,037 | 0,446890                  | 0,994711        | UB                      | 0,000303 | 0,965475 | 0,000152 | 0,026219 | 0,659436 | 0,647125 |          |          |  |
| GUB          | 0,966                         | 0,069 | 0,793004                  | 0,947672        | GUB                     | 0,000166 | 0,999994 | 0,000157 | 0,145385 | 0,221474 | 0,974735 | 0,996228 |          |  |
| Parthenolide | 0,573                         | 0,070 | 0,000996                  | 0,999977        | Parthenolide            | 0,237884 | 0,007535 | 0,000151 | 0,000158 | 0,948326 | 0,001252 | 0,100151 | 0,016858 |  |

  

|              | TGF- $\beta$ 1 mRNA expression | SD    | <i>post hoc</i> (Dunnett) |                 | <i>post hoc</i> (Tukey) |          |          |          |          |          |          |          |          |  |
|--------------|--------------------------------|-------|---------------------------|-----------------|-------------------------|----------|----------|----------|----------|----------|----------|----------|----------|--|
|              |                                |       | <i>p</i> (<LPS)           | <i>p</i> (>LPS) | NST                     | LPS      | iUA      | GiUA     | UA       | GUA      | UB       | GUB      |          |  |
| NST          | 1,938                          | 0,319 | 0,999977                  | 0,000020        | NST                     |          |          |          |          |          |          |          |          |  |
| LPS          | 1,000                          | 0,000 |                           |                 | LPS                     | 0,000152 |          |          |          |          |          |          |          |  |
| iUA          | 1,276                          | 0,061 | 0,999942                  | 0,077760        | iUA                     | 0,000366 | 0,382545 |          |          |          |          |          |          |  |
| GiUA         | 1,024                          | 0,129 | 0,927998                  | 0,836339        | GiUA                    | 0,000152 | 1,000000 | 0,498991 |          |          |          |          |          |  |
| UA           | 1,603                          | 0,250 | 0,999977                  | 0,000125        | UA                      | 0,167581 | 0,000972 | 0,187941 | 0,001544 |          |          |          |          |  |
| GUA          | 1,029                          | 0,109 | 0,935048                  | 0,822715        | GUA                     | 0,000152 | 1,000000 | 0,526359 | 1,000000 | 0,001722 |          |          |          |  |
| UB           | 1,350                          | 0,167 | 0,999973                  | 0,021201        | UB                      | 0,001312 | 0,130620 | 0,999332 | 0,190211 | 0,494948 | 0,206003 |          |          |  |
| GUB          | 0,980                          | 0,053 | 0,846782                  | 0,921913        | GUB                     | 0,000152 | 1,000000 | 0,298611 | 0,999989 | 0,000683 | 0,999973 | 0,094077 |          |  |
| Parthenolide | 1,256                          | 0,184 | 0,999905                  | 0,105615        | Parthenolide            | 0,000289 | 0,478509 | 1,000000 | 0,602079 | 0,137741 | 0,629843 | 0,996436 | 0,383650 |  |

**Table S5.** Effects of tested urolithins and respective glucuronides at the concentration of 40  $\mu$ M on LPS-induced TNF- $\alpha$ . PBMCs were incubated with iso-urolithin A, urolithin A and B (iUA, UA, UB) and their respective glucuronides (GiUA, GUA, GUB) at the concentration of 40  $\mu$ M and stimulated with LPS (100 ng/mL).

|             | TNF- $\alpha$ (%) | SD     | <i>post hoc</i> (Dunnett) |                 | <i>post hoc</i> (Tukey) |                 |                 |                 |                 |                 |                 |          |
|-------------|-------------------|--------|---------------------------|-----------------|-------------------------|-----------------|-----------------|-----------------|-----------------|-----------------|-----------------|----------|
|             |                   |        | <i>p</i> (<LPS)           | <i>p</i> (>LPS) | NST                     | LPS             | iUA             | GiUA            | UA              | GUA             | UB              |          |
| <b>NST</b>  | 0,528             | 0,587  | <b>0,000024</b>           | 0,999979        | <b>NST</b>              |                 |                 |                 |                 |                 |                 |          |
| <b>LPS</b>  | 100,000           | 0,000  |                           |                 | <b>LPS</b>              | <b>0,000150</b> |                 |                 |                 |                 |                 |          |
| <b>iUA</b>  | 45,587            | 3,325  | <b>0,000029</b>           | 0,999979        | <b>iUA</b>              | <b>0,002912</b> | <b>0,000407</b> |                 |                 |                 |                 |          |
| <b>GiUA</b> | 95,550            | 5,463  | 0,767267                  | 0,982755        | <b>GiUA</b>             | <b>0,000150</b> | 0,999774        | <b>0,000963</b> |                 |                 |                 |          |
| <b>UA</b>   | 8,198             | 3,478  | <b>0,000024</b>           | 0,999979        | <b>UA</b>               | 0,869576        | <b>0,000150</b> | <b>0,017525</b> | <b>0,000150</b> |                 |                 |          |
| <b>GUA</b>  | 131,429           | 24,683 | 0,999979                  | <b>0,000526</b> | <b>GUA</b>              | <b>0,000150</b> | <b>0,003358</b> | <b>0,000150</b> | <b>0,024751</b> | <b>0,000150</b> |                 |          |
| <b>UB</b>   | 95,059            | 10,860 | 0,709656                  | 0,988972        | <b>UB</b>               | <b>0,000150</b> | 0,998317        | <b>0,001069</b> | 1,000000        | <b>0,000150</b> | <b>0,003282</b> |          |
| <b>GUB</b>  | 101,317           | 4,807  | 0,951260                  | 0,883040        | <b>GUB</b>              | <b>0,000150</b> | 1,000000        | <b>0,000332</b> | 0,998762        | <b>0,000150</b> | <b>0,019703</b> | 0,992691 |

**Table S6.** Effects of tested urolithins and respective glucuronides at the concentration of 40  $\mu$ M on LPS-induced NF- $\kappa$ Bp65 nuclear translocation and ERK1/2 phosphorylation in THP-1 macrophages. PMA-differentiated THP-1 cells were preincubated for 1h with iso-urolithin A, urolithin A and B (iUA, UA, UB) and their respective glucuronides (GiUA, GUA, GUB) at the concentration of 40  $\mu$ M and stimulated with LPS (10 ng/mL) for 35 min. Parthenolide at the concentration of 5  $\mu$ M was used as a positive control. Western blotting analysis was performed as described in Materials and methods. Densitometric analysis was performed using ImageJ software. Changes in p65 protein levels in nuclear fractions were normalized to p65 protein levels in cytosolic fractions. The changes in phospho-ERK1/2 were normalized to total ERK1/2.

|              | p65 nuclear translocation | SD    | <i>post hoc</i> (Dunnett) |                 | <i>post hoc</i> (Tukey) |          |          |          |          |          |          |          |          |  |
|--------------|---------------------------|-------|---------------------------|-----------------|-------------------------|----------|----------|----------|----------|----------|----------|----------|----------|--|
|              |                           |       | <i>p</i> (<LPS)           | <i>p</i> (>LPS) | NST                     | LPS      | iUA      | GiUA     | UA       | GUA      | UB       | GUB      |          |  |
| NST          | 0,000                     | 0,000 | 0,000020                  | 0,999971        | NST                     |          |          |          |          |          |          |          |          |  |
| LPS          | 1,000                     | 0,000 |                           |                 | LPS                     | 0,000143 |          |          |          |          |          |          |          |  |
| iUA          | 0,683                     | 0,020 | 0,006501                  | 0,999971        | iUA                     | 0,000143 | 0,046530 |          |          |          |          |          |          |  |
| GiUA         | 0,514                     | 0,112 | 0,000049                  | 0,999971        | GiUA                    | 0,000232 | 0,000387 | 0,715946 |          |          |          |          |          |  |
| UA           | 0,782                     | 0,032 | 0,045704                  | 0,999923        | UA                      | 0,000143 | 0,186041 | 0,981363 | 0,153234 |          |          |          |          |  |
| GUA          | 0,405                     | 0,117 | 0,000020                  | 0,999971        | GUA                     | 0,003801 | 0,000146 | 0,120306 | 0,964913 | 0,008669 |          |          |          |  |
| UB           | 0,831                     | 0,042 | 0,192656                  | 0,999520        | UB                      | 0,000143 | 0,712987 | 0,832413 | 0,047095 | 0,999862 | 0,001964 |          |          |  |
| GUB          | 0,483                     | 0,112 | 0,000029                  | 0,999971        | GUB                     | 0,000418 | 0,000223 | 0,501859 | 0,999995 | 0,073272 | 0,996111 | 0,019834 |          |  |
| Parthenolide | 0,000                     | 0,000 | 0,000020                  | 0,999971        | Parthenolide            | 1,000000 | 0,000143 | 0,000143 | 0,000232 | 0,000143 | 0,003801 | 0,000143 | 0,000418 |  |

  

|              | ERK1/2 phosphorylation | SD    | <i>post hoc</i> (Dunnett) |                 | <i>post hoc</i> (Tukey) |          |          |          |          |          |          |          |          |  |
|--------------|------------------------|-------|---------------------------|-----------------|-------------------------|----------|----------|----------|----------|----------|----------|----------|----------|--|
|              |                        |       | <i>p</i> (<LPS)           | <i>p</i> (>LPS) | NST                     | LPS      | iUA      | GiUA     | UA       | GUA      | UB       | GUB      |          |  |
| NST          | 0,170                  | 0,094 | 0,000082                  | 0,999553        | NST                     |          |          |          |          |          |          |          |          |  |
| LPS          | 1,000                  | 0,000 |                           |                 | LPS                     | 0,661334 |          |          |          |          |          |          |          |  |
| iUA          | 1,921                  | 0,423 | 0,999869                  | 0,049058        | iUA                     | 0,015567 | 0,043506 |          |          |          |          |          |          |  |
| GiUA         | 1,379                  | 0,260 | 0,987035                  | 0,580605        | GiUA                    | 0,205182 | 0,994464 | 0,950585 |          |          |          |          |          |  |
| UA           | 3,153                  | 0,777 | 0,999977                  | 0,000226        | UA                      | 0,000160 | 0,001774 | 0,187516 | 0,013816 |          |          |          |          |  |
| GUA          | 1,140                  | 0,214 | 0,944748                  | 0,800609        | GUA                     | 0,468306 | 0,999997 | 0,726788 | 0,999793 | 0,003760 |          |          |          |  |
| UB           | 1,042                  | 0,077 | 0,908841                  | 0,865942        | UB                      | 0,603145 | 1,000000 | 0,593587 | 0,997531 | 0,002220 | 1,000000 |          |          |  |
| GUB          | 0,791                  | 0,064 | 0,744861                  | 0,962440        | GUB                     | 0,898517 | 0,999927 | 0,278225 | 0,923218 | 0,000623 | 0,996912 | 0,999712 |          |  |
| Parthenolide | 0,793                  | 0,092 | 0,746568                  | 0,962007        | Parthenolide            | 0,896919 | 0,999932 | 0,280234 | 0,924549 | 0,000629 | 0,997031 | 0,999729 | 1,000000 |  |

**Table S7.** Effects of tested urolithins and respective glucuronides at the concentration of 40  $\mu$ M on f-MLP-induced  $\beta$ -glucuronidase release from human primary neutrophils. After isolation, neutrophils were resuspended in HBSS with iso-urolithin A, urolithin A and B (iUA, UA, UB) and their respective glucuronides (GiUA, GUA, GUB) at the concentration of 40  $\mu$ M primed with cytochalasin B (10  $\mu$ M) for 5 min and then stimulated with f-MLP (1  $\mu$ M) for 10 min. Genistein at the concentration of 40  $\mu$ M was used as a positive control.

|                  | $\beta$ -glucuronidase (%) | SD   | <i>post hoc</i> (Dunnett) |                 | <i>post hoc</i> (Tukey) |          |                 |                 |          |                 |          |          |          |  |
|------------------|----------------------------|------|---------------------------|-----------------|-------------------------|----------|-----------------|-----------------|----------|-----------------|----------|----------|----------|--|
|                  |                            |      | <i>p</i> (<LPS)           | <i>p</i> (>LPS) | NST                     | LPS      | iUA             | GiUA            | UA       | GUA             | UB       | GUB      |          |  |
| <b>NST</b>       | 60,9                       | 7,6  | <b>0,013047</b>           | 0,999972        | <b>NST</b>              |          |                 |                 |          |                 |          |          |          |  |
| <b>LPS</b>       | 100,0                      | 0,0  |                           |                 | <b>LPS</b>              | 0,087996 |                 |                 |          |                 |          |          |          |  |
| <b>iUA</b>       | 96,2                       | 3,5  | 0,788193                  | 0,926403        | <b>iUA</b>              | 0,145624 | 0,999999        |                 |          |                 |          |          |          |  |
| <b>GiUA</b>      | 79,2                       | 6,8  | 0,308796                  | 0,996707        | <b>GiUA</b>             | 0,721582 | 0,888322        | 0,961493        |          |                 |          |          |          |  |
| <b>UA</b>        | 40,8                       | 14,6 | <b>0,000917</b>           | 0,999978        | <b>UA</b>               | 0,994139 | <b>0,013853</b> | <b>0,006582</b> | 0,248087 |                 |          |          |          |  |
| <b>GUA</b>       | 85,4                       | 8,4  | 0,457707                  | 0,990301        | <b>GUA</b>              | 0,466331 | 0,984274        | 0,994364        | 0,999965 | <b>0,044542</b> |          |          |          |  |
| <b>UB</b>        | 61,8                       | 8,3  | <b>0,030522</b>           | 0,999958        | <b>UB</b>               | 0,999640 | 0,253034        | 0,213364        | 0,956335 | 0,781710        | 0,665537 |          |          |  |
| <b>GUB</b>       | 101,6                      | 7,6  | 0,896030                  | 0,839290        | <b>GUB</b>              | 0,070802 | 1,000000        | 0,999963        | 0,843751 | <b>0,002479</b> | 0,934993 | 0,097136 |          |  |
| <b>Genistein</b> | 92,2                       | 14,6 | 0,679385                  | 0,962420        | <b>Genistein</b>        | 0,233997 | 0,999809        | 0,999997        | 0,992350 | <b>0,013444</b> | 0,999779 | 0,349463 | 0,997926 |  |
