# Supplementary material for: Comparative studies of urolithins and their phase II metabolites on macrophage and neutrophil functions
Source: PubMed Central journal article supplement (PMC8137622; doi:10.1007/s00394-020-02386-y), 2020-09-22
Supplement: 394_2020_2386_MOESM2_ESM.pdf [file 394_2020_2386_MOESM2_ESM.pdf]

## Supplementary material Figures S1-S4

### *European Journal of Nutrition*

#### **Comparative studies of urolithins and their phase II metabolites on macrophage and neutrophil functions.**

Aneta Bobowska<sup>1</sup>, Sebastian Granica<sup>1</sup>, Agnieszka Filipek<sup>1</sup>, Matthias F. Melzig<sup>2</sup>, Thomas Moeslinger<sup>3</sup>, Jürgen Zentek<sup>4</sup>, Aleksandra Kruk<sup>1</sup>, Jakub P. Piwowski<sup>1,2,4</sup>

<sup>1</sup>Department of Pharmacognosy and Molecular Basis of Phytotherapy, Faculty of Pharmacy, Medical University of Warsaw, Warsaw, Poland

<sup>2</sup>Department of Pharmaceutical Biology, Institute of Pharmacy, Freie Universität Berlin, Berlin, Germany

<sup>3</sup>Institute of Physiology, Center for Physiology and Pharmacology, Medical University of Vienna, Vienna, Austria

<sup>4</sup>Institute of Animal Nutrition, Freie Universität Berlin, Berlin, Germany

Corresponding author:

dr hab. Jakub Patryk Piwowski, Department of Pharmacognosy and Molecular Basis of Phytotherapy, Faculty of Pharmacy, Medical University of Warsaw, Banacha 1, 02-097 Warsaw, Poland. e-mail: jakub.piwowski@wum.edu.pl

ORCID: <http://orcid.org/0000-0002-5011-0983>

**Figure S1.** Effects of tested urolithins and respective glucuronides at the concentration of 40  $\mu\text{M}$  on viability of THP-1 macrophages. PMA-differentiated THP-1 cells were preincubated for 1h with iso-urolithin A, urolithin A and B (iUA, UA, UB), their respective glucuronides (GiUA, GUA, GUB) at the concentration of 40  $\mu\text{M}$ , parthenolide (Parth) at the concentration of 5  $\mu\text{M}$  and stimulated with LPS (10 ng/mL) for 24 h. MTT test was performed as described in Materials and methods section. \* $p < 0.05$ , \*\* $p < 0.001$  versus stimulated control (Dunnett's *post hoc* test); LPS—stimulated control; NST—non-stimulated control. Three separate experiments were conducted in triplicate. Mean  $\pm$  SD and  $p$  values are provided in supporting Information Table S1.

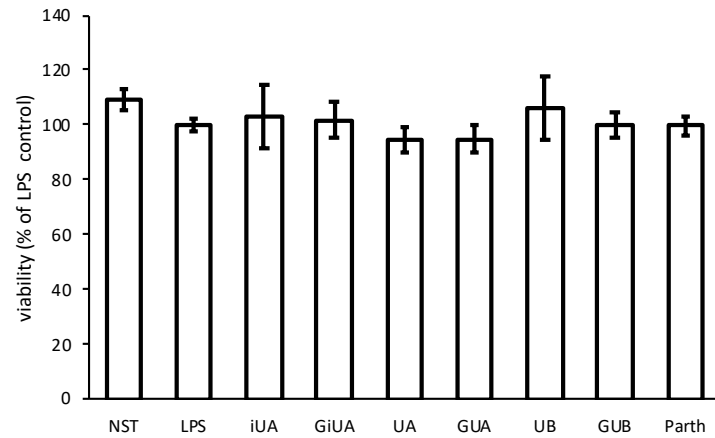

**Figure S2.** Effects of tested urolithins and respective glucuronides at the concentration of 40  $\mu\text{M}$  on apoptosis of non-stimulated (A) and LPS-stimulated (100 ng/ml) (B) human primary neutrophils. Neutrophils were incubated with iso-urolithin A, urolithin A and B (iUA, UA, UB), their respective glucuronides (GiUA, GUA, GUB) at the concentration of 40  $\mu\text{M}$  and/or stimulated with LPS (10 ng/mL) for 20 h. Neutrophils' viability and apoptosis was determined by staining with propidium iodide (PI) and Annexin V-FITC after 6h in non-stimulated cells (A) and after 20h in LPS-stimulated cells. Statistical significance: \* $p < 0.05$ , \*\* $p < 0.001$  versus stimulated control (Dunnett's post hoc test); LPS—stimulated control; NST—non-stimulated control. Roscovitine (rosc) at the concentration of 40  $\mu\text{M}$  was used as a positive control. Data were expressed as mean  $\pm$  SD of four separate experiments performed with cells isolated from independent donors. Mean  $\pm$  SD and  $p$  values are provided in supporting Information Table S2.

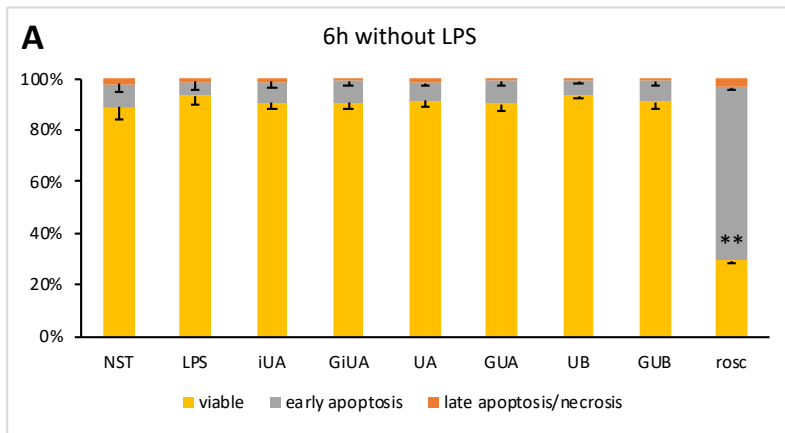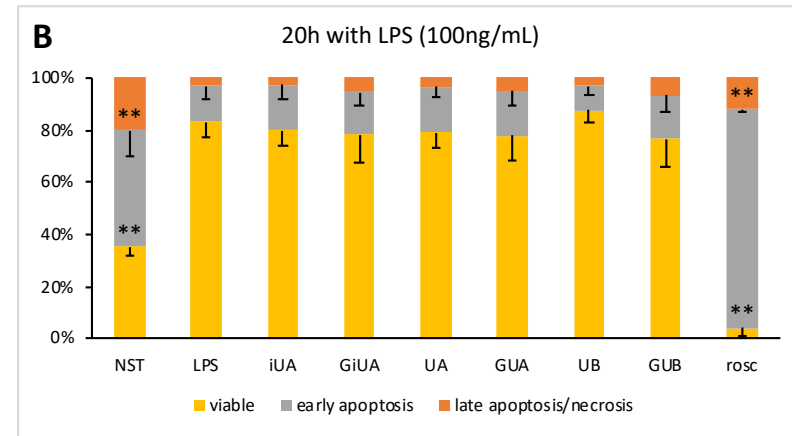

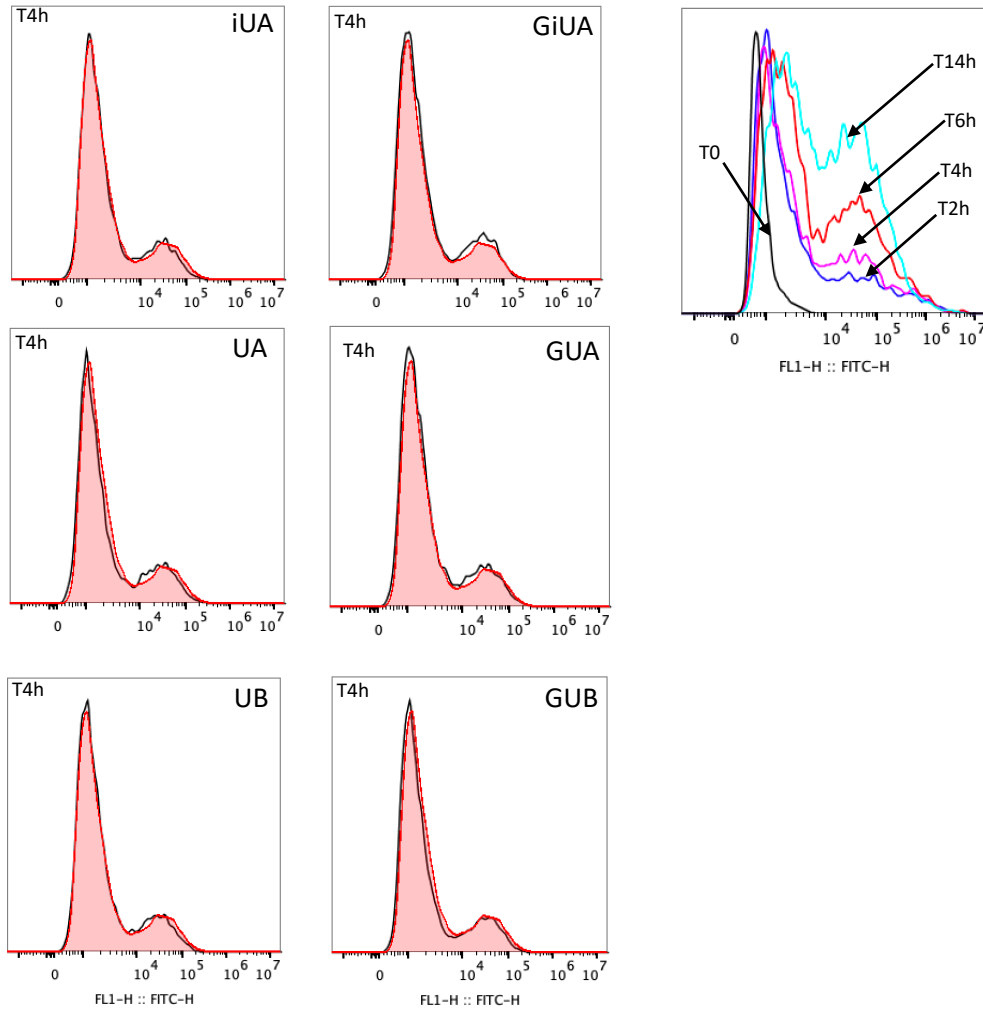

**Figure S3.** Effects of tested urolithins and respective glucuronides at the concentration of 40  $\mu$ M on phagocytosis of IgG-FITC-coated beads by THP-1 macrophages. THP-1 macrophages were incubated with iso-urolithin A, urolithin A and B (iUA, UA, UB) and their respective glucuronides (GiUA, GUA, GUB) at the concentration of 40  $\mu$ M for 1h. After treatment with compounds, 20  $\mu$ L of FITC labelled beads suspension was added to the culture and the cells were incubated at 37  $^{\circ}$ C for 4h. Data are representative for three independent experiments.

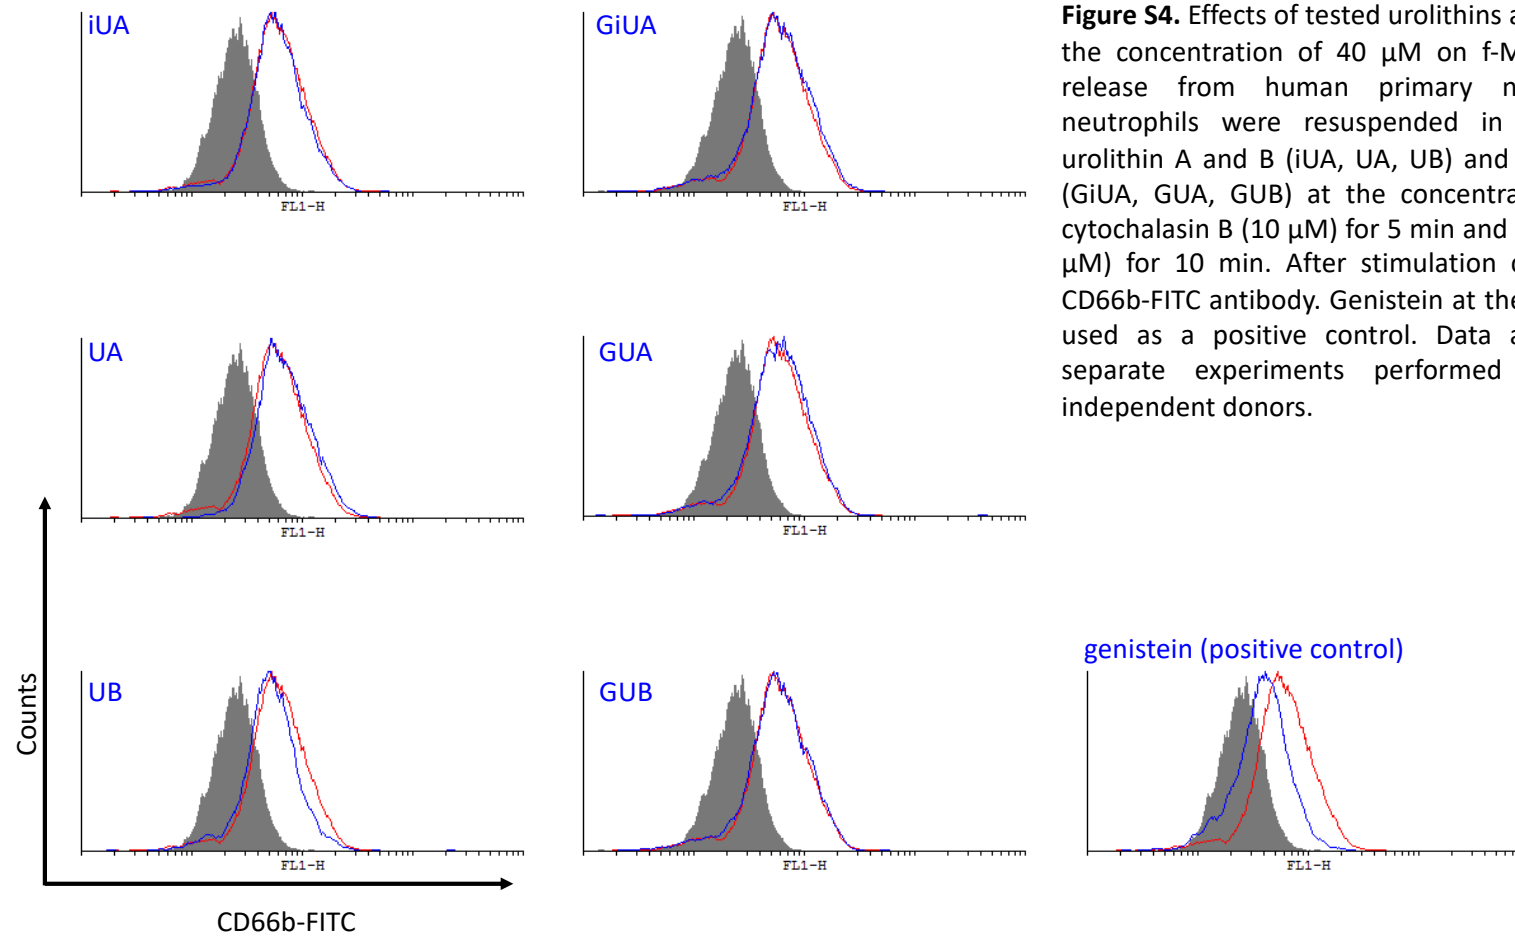

**Figure S4.** Effects of tested urolithins and respective glucuronides at the concentration of 40  $\mu\text{M}$  on f-MLP-induced specific granules release from human primary neutrophils. After isolation, neutrophils were resuspended in HBSS with iso-uroolithin A, urolithin A and B (iUA, UA, UB) and their respective glucuronides (GiUA, GUA, GUB) at the concentration of 40  $\mu\text{M}$  primed with cytochalasin B (10  $\mu\text{M}$ ) for 5 min and then stimulated with f-MLP (1  $\mu\text{M}$ ) for 10 min. After stimulation cells were stained with anti-CD66b-FITC antibody. Genistein at the concentration of 40  $\mu\text{M}$  was used as a positive control. Data are representative for three separate experiments performed with cells isolated from independent donors.

non-stimulated  
stimulated (fMLP)  
tested compound
